# Supplementary material for: Bio-inspired unprecedented synthesis of reduced graphene oxide: a catalytic probe for electro-/chemical reduction of nitro groups in an aqueous medium
Source: Royal Society of Chemistry journal article supplement (doi:10.1039/c7nj04732k), 2017-12-26
Supplement: c7nj04732k1.pdf [file c7nj04732k1.pdf]

Electronic Supplementary Material (ESI) for New Journal of Chemistry.  
This journal is © The Royal Society of Chemistry.

## ESI

### **Bio-inspired unprecedented synthesis of reduced graphene oxide: catalytic probe for electro-/chemical reduction of nitro group in aqueous medium**

Suhasini Mahata,<sup>a</sup> Anjumala Sahu,<sup>a</sup> Prashant Shukla,<sup>b</sup> Ankita Rai,<sup>b</sup> Manorama Singh,<sup>a</sup> and Vijai K. Rai<sup>a\*</sup>

#### **Table of Contents**

1. General Information
2. Comparison of FTIR spectra of nitrobenzene and aniline.
3. Spectroscopic (FTIR, <sup>1</sup>H NMR and <sup>13</sup>C NMR) data of aniline.
4. <sup>1</sup>H NMR and <sup>13</sup>C NMR Spectra of Aniline.

1. **General Information:** All chemicals used in this study were analytical grade, commercially available and used without further purification. Graphite (CAS No.1E4011854, particle size: <100 $\mu\text{m}$ ) was purchased from Sdfine. Most of the products were identified by FTIR,  $^1\text{H}$  NMR and  $^{13}\text{C}$  NMR. The progress of the catalytic reactions was monitored by TLC using silica gel. FT-IR spectra were recorded on a Thermo Nicolet, Avatar370 Spectrometer with resolution 4  $\text{cm}^{-1}$  and Sample in KBr. The  $^1\text{H}$  NMR and  $^{13}\text{C}$  NMR spectra were recorded on a Bruker Advance III, 400 MHz instrument in  $\text{CDCl}_3$  or  $\text{DMSO-}d_6$  solvents using TMS as internal standard. Chemical shifts were reported in ppm ( $\delta$ ) and coupling constants ( $J$ ) in Hz. X-ray diffraction (XRD) analysis was conducted on a Bruker AXS D8 X-ray diffractometer with  $\text{CuK}\alpha$  radiation ( $\lambda = 1.5406 \text{ \AA}$ ). A transmission electron microscopy (JEOL 2100F) with an accelerating voltage 200 kV with a probe size under 0.5 nm to examine the morphology. The Scanning electron microscopy with EDAX images were obtained on VEGA 3 TESCAN, EDAX (Bruker) instrument. The absorbance of graphene oxide solutions was detected by UV-Vis Spectrophotometer.
2. The characteristic N=O *str.* at 1570-1500  $\text{cm}^{-1}$  and 1370-1300 $\text{cm}^{-1}$  completely removed and a significant peak at 1278.42  $\text{cm}^{-1}$  appeared for the C-N *str.* in primary aromatic amines, showed in FTIR spectrum of aniline

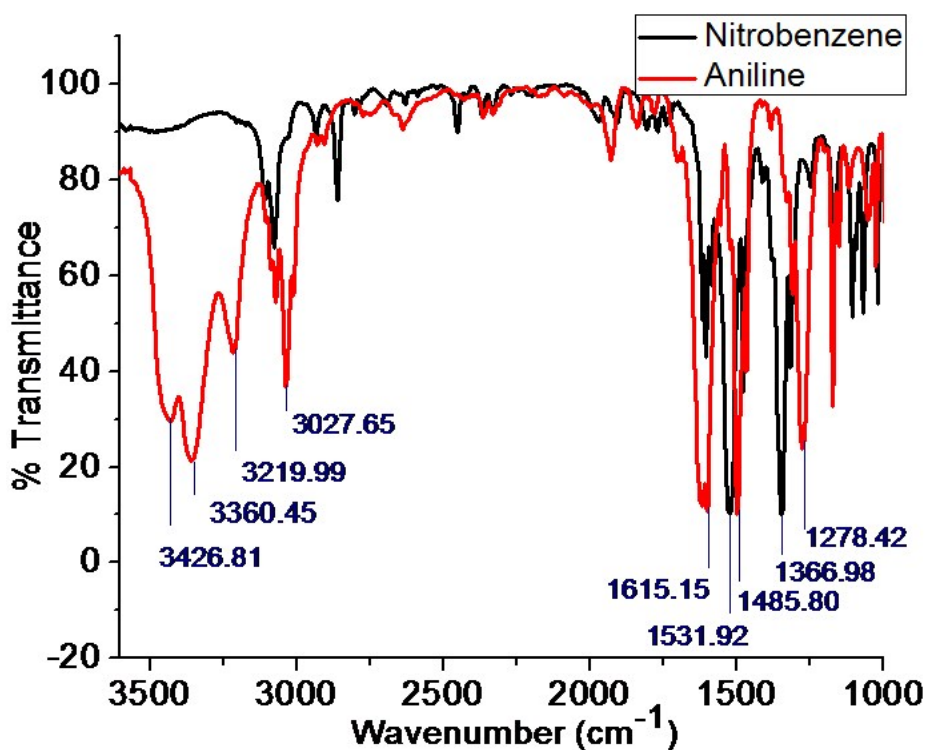

**Fig. S 1:** Comparison of FTIR spectra of nitrobenzene and aniline.

3. The  $^1\text{H}$  NMR and  $^{13}\text{C}$  NMR spectra were recorded on a Bruker Advance III, 400 MHz instrument in  $\text{CDCl}_3$  or  $\text{DMSO-}d_6$  solvents using TMS as internal standard. Chemical shifts were reported in ppm ( $\delta$ ) and coupling constants ( $J$ ) in Hz. *Aniline*: pale brown liquid (94%), bp 184-185  $^{\circ}\text{C}$ . IR (KBr)  $\nu_{\text{max}}$  3426.81, 3360.45, 3027.65, 1615.15, 1485.80, 1278.42  $\text{cm}^{-1}$ .  $^1\text{H}$  NMR (400 MHz;  $\text{CDCl}_3/\text{TMS}$ ):  $\delta$ :

7.15 (dd, 2H<sub>aromatic</sub>,  $J=7.2, 0.8$  Hz) 6.75 (t, 1H<sub>aromatic</sub>,  $J=7.6$  Hz), 6.68 (d, 2H<sub>aromatic</sub>,  $J=7.2, 0.8$  Hz), 4.14 (s, 2H, N-H). <sup>13</sup>C NMR (CDCl<sub>3</sub>/TMS)  $\delta$ : 115.2, 118.6, 129.3, 146.4.

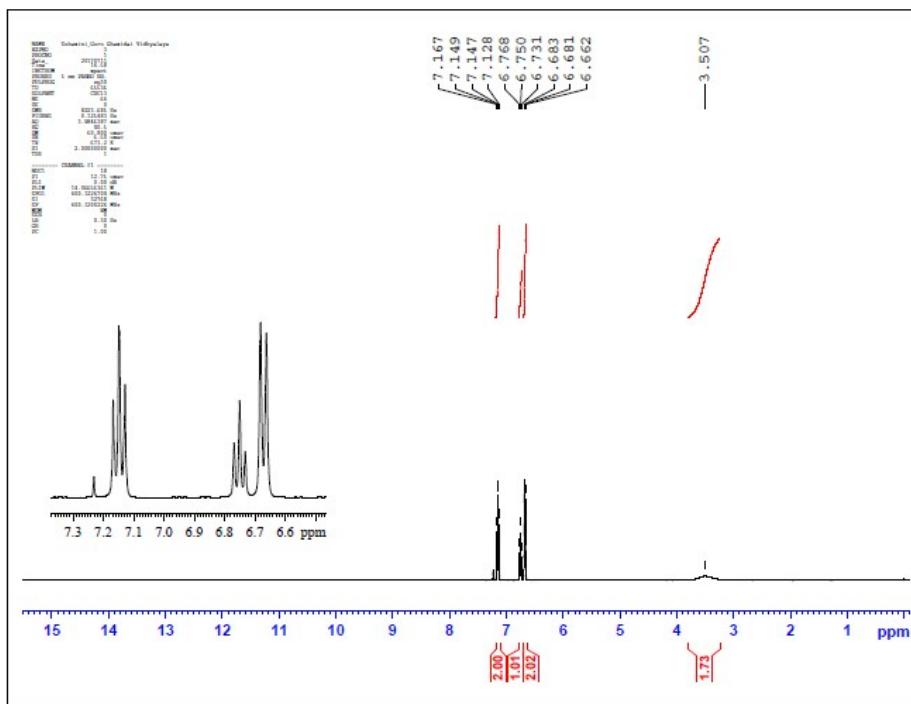

Fig. S 2: <sup>1</sup>H NMR spectrum of aniline

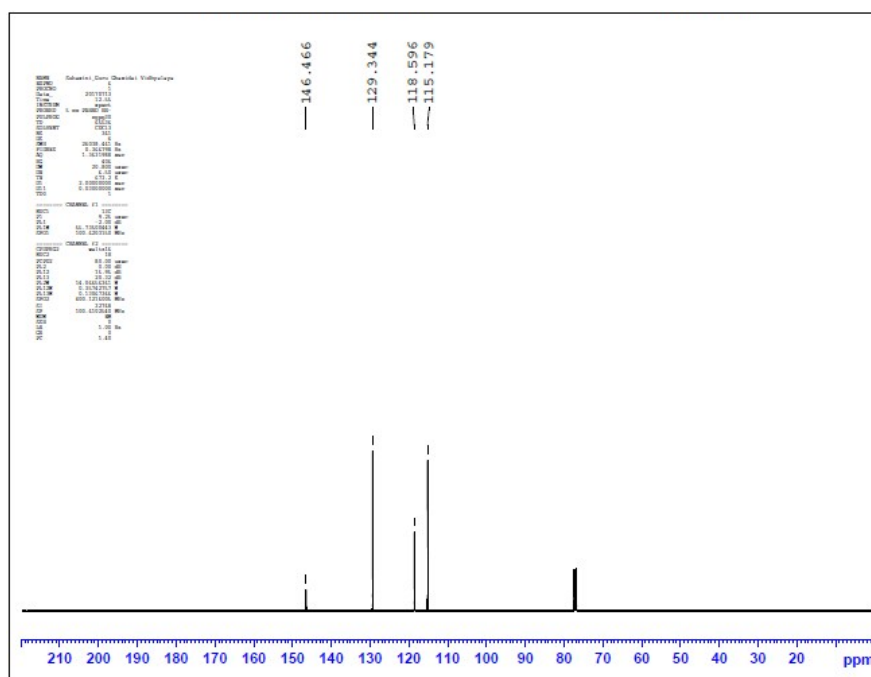

Fig. S 3: <sup>13</sup>C NMR spectrum of aniline
